# Supplementary material for: The intersectional privilege of white able-bodied heterosexual men in STEM
Source: PubMed Central journal article supplement — Sci Adv. 2022 Jun 15;8(24):eabo1558. doi: 10.1126/sciadv.abo1558 (PMC9200289; doi:10.1126/sciadv.abo1558), 2022-06-15
Supplement: sciadv.abo1558_sm.pdf [file sciadv.abo1558_sm.pdf]

Supplementary Materials for  
**The intersectional privilege of white able-bodied heterosexual men in STEM**

Erin A. Cech

Corresponding author: Erin A. Cech, [ecech@umich.edu](mailto:ecech@umich.edu)

*Sci. Adv.* **8**, eabo1558 (2022)  
DOI: 10.1126/sciadv.abo1558

**This PDF file includes:**

Supplementary Text  
Fig. S1  
Tables S1 to S6  
References

## **Additional Methods and Materials Information**

### ***STEM Inclusion Study Survey***

In collaboration with the leadership of each professional society, the STEM Inclusion Study was fielded electronically via email to either a random sample of the US-based members of each society (for societies over 10,000 members) or to the full US-based membership of the society (for societies under 10,000 members). The survey was open at each society for a period of six weeks. Non-responders received up to two reminder emails. Respondents could end the survey at any time and participation was anonymous and voluntary. The study was approved by the University of Michigan human subjects board.

Survey respondents were asked a variety of questions about their education, job circumstances, STEM discipline, workplace experiences, treatment by colleagues, future plans, and detailed demographics. The survey included skip logics that could accommodate retired members, students, and members who worked in non-STEM jobs; the analyses here only include data from respondents who were employed full time in a non-social science STEM job in the United States at the time of survey participation. After completing the survey, respondents were invited to enter a raffle for a \$100 gift card (one per professional society) that could be used toward the annual cost of their society membership. To avoid duplicate individual entries, the first question in the survey asked respondents whether they had taken the survey previously; those who answered affirmatively were thanked and skipped to the end of the survey.

A survey of the size and substantive scope used here is the most effective way to tap nuanced intersectional differences in work experiences while also assessing whether those differences can be explained by variation between groups. At the time of writing, no other national survey of STEM professionals included adequate sampling procedures, a sufficient sample size, disability status and LGBTQ identity measures, and work experience questions that would allow for an investigation of this specificity and scope.

### ***Survey Reliability and Validity***

The measures used in the analyses are either replications of existing validated survey items or items that were designed and pre-tested by the research team. Specifically, education level, STEM field, supervisory status, employment sector, and salary measures are from the National Science Foundation's National Survey of College Graduates (<https://www.census.gov/programs-surveys/nscg.html>). Social inclusion and persistence measures are replications of questions in the National Survey of the Changing Workforce (<https://www.shrm.org/hr-today/trends-and-forecasting/research-and-surveys/pages/national-study-of-the-changing-workforce.aspx>). The career advancement opportunities questions are from the US Office of Personnel Management's biennial Merit Principles Survey (<https://www.mspb.gov/studies/MPS2016.htm>).

The five items that make up the professional respect scale were designed specifically for the SIS. These measures assess whether respondents' professional expertise is recognized and given proper credit by their colleagues. See Cech and Waidzunas (14) for a description of the pretesting procedures used to validate this scale.

The validity of the full survey instrument was assessed through a number of steps. First, content validity was established by workshopping the survey with a panel of social scientists who are content experts on workplace inequality. Second, the face validity of the survey was

assessed through in-person talk-through sessions (aka “cognitive interviews”) with eight STEM professionals. In these sessions, informants explained aloud their interpretations of each question and its answer options as they progressed through the survey. These cognitive interviews offered insight into the clarity of survey questions (64). Third, construct validity was established through analysis of the divergence of dissimilar concepts and convergence of similar concepts via correlations and factor loadings (64-65). Indicating strong convergence validity, the questions used for the three scale measures (social inclusion, career opportunities, professional respect) each loaded onto their respective factors. Discriminant validity tests indicated that the measures in a given outcome scale were more highly correlated with measures in their own scale than with measures included in other scales; within-index correlations ranged from .64 to .76 (strongly correlated) while cross-index correlations were less than .40 (weakly correlated). Additionally, confirmatory factor analysis (CFA) with structural equation modeling (SEM) of the attitudinal outcome measures found that the SEM with items predicting latent variables that represent the scale measures used in the analysis had significantly better fit than the SEM where these attitudinal items predicted a single latent outcome measure ( $\Delta df=8$ ;  $\Delta\chi^2 = 5267$ ;  $p<.001$ ). Finally, factor analysis of all attitudinal items that make up the outcome measures revealed five factors that reflect the same division of measures into substantive scales that is used in the manuscript.

### ***Descriptive Statistics***

Table S1 presents means for all respondents and for WAHM and non-WAHM respondents separately. The p-value column indicates the statistical significance of two-tailed bivariate difference in means tests between WAHM and non-WAHM. WAHM make up 42.7% of the survey sample. White men without disabilities (across LGBTQ status) make up 46.9% of STEM workers in the US generally. Given variation in demographic representation across sectors and STEM fields, and differences by education level and average age, it was important to control for this variation in Figs. 1-6 when assessing possible intersectional demographic differences along the six focal workplace experience measures.

The rightmost column in Table S1 presents means for the US STEM population nationally, drawn from 2017 National Science Foundation data (<https://nces.nsf.gov/pubs/nsf19304/data>). Compared to the STEM population overall, the SIS survey data over-represent those who are white, who work in engineering and physical sciences, and those who work in university and government sectors. Supplemental analyses (discussed in the robustness tests section of the main text) reran all models while weighting the survey sample to match these NSF data by demographics, sector, and STEM field; the results patterns did not change with this weighting.

### ***Detailed Decomposition Results***

In Table S2, the explanatory power of each category of factors, and the specific factors within each category, are presented for the six outcome measure. Specifically, Table S2 presents the total gap between WAHM and non-WAHM (first row), the portion of that gap that is explained by the factors included in the model (third row), and the portion of that gap that remains unexplained once variation between WAHM and non-WAHM on these factors is accounted for (second row). The rest of Table S2 provides the portions of the WAHM/non-WAHM gap that is explained by each category of predictors and by the specific measures within each category. For example, 5% of the gap in experiences of social inclusion can be explained by

average differences between WAHM and non-WAHM in family responsibilities; the bulk of this is due to differences in primary childcare responsibilities (which explains 4.06% of the total gap in social inclusion experiences).

In these decomposition models, in order for predictor measures to have significant independent contributions to the WAHM/non-WAHM gap in question, predictors must (1) be directly related to the work experiences outcome, and (2) be unequally distributed between WAHM and non-WAHM (66). Positive coefficients in Table S2 indicate factors that help account for this gap. For instance, 27% (\$6,743) of the WAHM/non-WAHM salary gap can be attributed to WAHM being more likely than non-WAHM to be employed in the higher-paying for-profit industry sector.

A negative value in Table S2 indicates an offsetting contribution of that factor to the gap. For instance, the value for “work is an important part of my identity” has a negative coefficient (-.0034) in the decomposition results for persistence intentions. In supplemental OLS regression models predicting persistence intentions with the full sample, personal identification with work is a strongly significant and positive predictor of persistence intentions ( $B=.430$ ,  $p<.001$ ). However (as shown in Table S1), non-WAHM are significantly more likely than WAHM to agree that they personally identify with their work. As such, accounting for differences in personal identification with work widens the WAHM/non-WAHM gap in persistence intentions that must be accounted for by other factors.

Table S3 summarizes the results of decomposition models with and without a control for job satisfaction. See the robustness tests section in the main text. Table S3 summarizes the unexplained and explained portion of the decomposition models with and without job satisfaction included; it lists the portions of the WAHM/non-WAHM gap explained by job satisfaction alone, and then the total portion explained when job satisfaction is included in the model.

### ***Assessment of Intersectional Variability among Non-WAHM Groups***

Although the central focus of the paper is to examine potential patterns of intersectional privilege among the most culturally and numerically dominant group in STEM, it is important to assess variability within these pattern among non-WAHM groups. The following analysis (1) examines the premiums accompanying WAHM status compared to disaggregated intersectional groups within the non-WAHM category, and (2) looks for broad patterns in the relative strength of the effect of each identity dimension in the context of others.

First, the focal analysis testing H2 sought to document potential privilege premiums for WAHM compared to all others. Doing so revealed important patterns net of a host of explanatory factors, but a drawback of this approach is that it aggregates the potentially wide variability among non-WAHM groups into a single category. To explore this variability, Table S4 summarizes results from separate decomposition models that compare WAHM to specific intersectional groups within the non-WAHM category. The values in Table S4 table represent the magnitude of the difference between WAHM and the focal non-WAHM group that remains unaccounted for by the explanatory factors included in the decomposition model. For example, in the decomposition models comparing WAHM to heterosexual Black women without disabilities, WAHM’s average on the social inclusion measure was .445 points higher than the average for heterosexual Black women without disabilities. The decomposition model indicated that only 7.2% of this gap could be accounted for by explanatory factors in the model, leaving a net gap of .413. Because running decomposition models required larger subgroup sample sizes

than the tests for H1, Table S4 does not disaggregate disability status among LGBTQ-identifying STEM professionals of color (although it does disaggregate by disability status among heterosexual persons of color). Additionally, due to small sample sizes, some of the effects for the smallest groups do not reach full statistical significance even though they are substantively large.

The shading in Table S4 represents the relative magnitude of the gaps between WAHM and each non-WAHM group, with darker gray shading indicating the largest gaps. The shading thresholds are proportions of the standard deviation on that measure: the most lightly shaded cells contain statistically significant values that are less than 25% of the magnitude of the standard deviation of that outcome. The next darkest shadings represent values that are at least 25% of the magnitude of the standard deviation, at least 50%, at least 75% and 100% or more of the magnitude of the standard deviation on that measure. Key findings from Table S4 are highlighted in the supplemental analysis section in the main text.

Second, while theories of intersectionality do not interpret identity dimensions as operating separately from one another, it is instructive to understand whether variation along specific axes has outsized implications for workplace experiences. One way to capture these patterns is to look at the effect sizes of variation along one identity category on experiences across the other intersectional categories. While effect sizes are typically used to assess the strength of experimental outcomes and thus are less clearly interpretable in survey data, they provide a standardized comparison of differences across groups on specific outcomes. Table S5 presents the effect sizes (here,  $D$ =difference in means/pooled standard deviation) of specific identity dimensions among each intersectional group. The final row of each cluster in Table S5 provides the average effect size of variation on the focal identity dimension across subgroups on that outcome. Key findings from the results in this table are discussed in the supplemental analyses section of the main text. Future research should carefully attend to these differences with multimethod empirical approaches that can speak to the differential and intersectional cultural and structural processes that produce these effects.

### ***Summary of Results from Field- and Sector-Specific Decomposition Models***

Overall, the patterns of advantage by WAHM status documented in the main text and the decomposition results in Table S2 are mirrored in models ran separately for each STEM field and each employment sector. Specifically, the unexplained portions of the WAHM status advantage for the outcome measures in each of the STEM fields were all within 8 percentage points of the values listed in the second row of Table S2 except for the following: the percent of salary gap left unexplained was higher in life sciences and in computer science and mathematics (46% and 45% left unexplained, respectively) compared to the full sample (31%), and that the unexplained portion of persistence intentions was lower in life sciences and computer science and mathematics (28% and 48%, respectively) compared to 69% in the full sample.

The unexplained portion of variation by WAHM status on each of the outcome measures by employment sectors were all within 7 percentage points of the Table S2 values except that the unexplained portion of persistence intentions was lower among those employed in the nonprofit sector (46%) compared to the full sample (69% unexplained), the proportion of unexplained variation in professional opportunities in the for-profit sector (43%) was lower than the unexplained portion in the full sample (59%), and, likely due to tightly regulated salary

determination in federal agencies, the unexplained portion of the salary gap in the government sector was 13%, compared to 31% in the full sample.

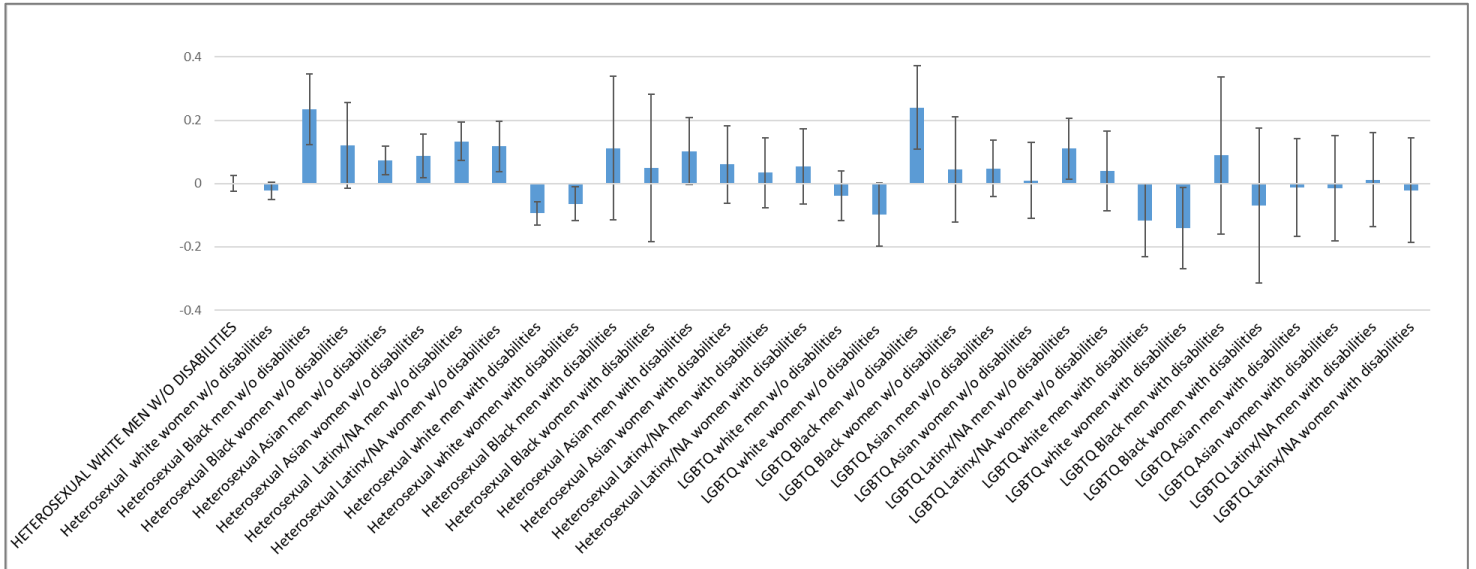

**Fig. S1: STEM Professionals’ Willingness to Put in Extra Effort beyond what is Required of Their Job, by Intersectional Demographic Category, Centered at Mean for WAHM.** Predicted means for each category, holding constant variation by STEM field, employment sector, highest education, and age. Values represent the average divergence of each group’s experiences from those of WAHM. Values were produced by OLS regression models with gender x race x LGBTQ status x disability status interaction terms. Error bars represent 95% Confidence Intervals. N=25,324. WAHM= white heterosexual men without disabilities.

**Table S1.** Univariate and Bivariate Statistics for Demographics, Explanatory Measures, and Outcomes, for All Respondents and for WAHM and non-WAHM Respondents in the SIS Survey Data, and Descriptive Statistics from National Science Foundation Data on US STEM Professionals.

|                                             | ALL<br>N=25,324 | White<br>heterosexual<br>men without<br>disabilities<br>(WAHM)<br>N=10,823 | Non-WAHM<br>N=14,501 | Significance<br>(WAHM vs<br>Non-WAHM) | 2017 NSF<br>Data |
|---------------------------------------------|-----------------|----------------------------------------------------------------------------|----------------------|---------------------------------------|------------------|
| WAHM (white able-bodied heterosexual men)   | 42.74%          | ---                                                                        | ---                  | ---                                   | ---              |
| Women (cisgender & transgender)             | 30.17%          | ---                                                                        | ---                  | ---                                   | 29.00%           |
| Men (cisgender & transgender)               | 69.81%          | ---                                                                        | ---                  | ---                                   | 71.00%           |
| Transgender & Gender Non-binary             | 0.85%           | ---                                                                        | ---                  | ---                                   | ---              |
| LGBTQ                                       | 4.51%           | ---                                                                        | ---                  | ---                                   | ---              |
| Black                                       | 2.19%           | ---                                                                        | ---                  | ---                                   | 5.73%            |
| Hispanic/Latinx                             | 5.91%           | ---                                                                        | ---                  | ---                                   | 7.58%            |
| Asian                                       | 10.20%          | ---                                                                        | ---                  | ---                                   | 20.09%           |
| Native American and Asian Pacific Islander  | 0.93%           | ---                                                                        | ---                  | ---                                   | 0.57%            |
| White                                       | 78.89%          | ---                                                                        | ---                  | ---                                   | 66.02%           |
| Other race/ethnicity                        | 5.51%           | ---                                                                        | ---                  | ---                                   | ---              |
| Disability                                  | 15.92%          | ---                                                                        | ---                  | ---                                   | ---              |
| Engineering                                 | 38.58%          | 43.91%                                                                     | 34.63%               | ***                                   | 20.18%           |
| Life Sciences                               | 11.72%          | 7.79%                                                                      | 14.48%               | ***                                   | 7.12%            |
| Physical Sciences                           | 21.92%          | 23.22%                                                                     | 20.30%               | ***                                   | 4.30%            |
| Computer Science & Mathematics              | 15.52%          | 14.28%                                                                     | 16.84%               | ***                                   | 39.90%           |
| Other STEM Occupation                       | 12.26%          | 10.75%                                                                     | 13.74%               | ***                                   | 28.49%           |
| For-Profit Sector                           | 33.71%          | 39.45%                                                                     | 28.81%               | ***                                   | 63.77%           |
| University Sector                           | 39.91%          | 35.25%                                                                     | 43.97%               | ***                                   | 13.01%           |
| Government Sector                           | 13.71%          | 13.16%                                                                     | 13.81%               | ---                                   | 11.60%           |
| Nonprofit Sector                            | 5.28%           | 4.45%                                                                      | 5.86%                | ***                                   | 5.31%            |
| K-12 Sector                                 | 3.81%           | 2.73%                                                                      | 4.58%                | ***                                   | 3.19%            |
| Other Sector                                | 3.57%           | 4.86%                                                                      | 2.94%                | ***                                   | 3.12%            |
| Highest Degree                              | 6.59            | 6.45                                                                       | 6.70                 | ***                                   | ---              |
| Age                                         | 49.84           | 52.34                                                                      | 48.02                | ***                                   | ---              |
| Born in the US                              | 72.41%          | 80.66%                                                                     | 65.71%               | ***                                   | ---              |
| Parents' Highest Degree                     | 4.30            | 4.28                                                                       | 4.32                 | ---                                   | ---              |
| Years at employing organization             | 13.53           | 15.12                                                                      | 12.26                | ***                                   | ---              |
| Employer Size                               | 5.60            | 5.45                                                                       | 5.67                 | ***                                   | ---              |
| Job related to highest degree               | 2.68            | 2.67                                                                       | 2.68                 | ---                                   | ---              |
| Supervisory responsibilities                | 57.45%          | 60.39%                                                                     | 55.09%               | ***                                   | ---              |
| Core Technical Work Indicator               | 39.15%          | 38.79%                                                                     | 39.16%               | ---                                   | ---              |
| Primarily work in teams                     | 63.03%          | 65.57%                                                                     | 60.97%               | ***                                   | ---              |
| Average hours worked per week               | 48.06           | 47.86                                                                      | 48.21                | *                                     | ---              |
| Willing to put in extra effort              | 4.12            | 4.23                                                                       | 4.21                 | ---                                   | ---              |
| Work is an important part of identity       | 4.19            | 4.18                                                                       | 4.22                 | *                                     | ---              |
| Personally care about fate of organization  | 4.20            | 4.25                                                                       | 4.14                 | ***                                   | ---              |
| Have young/school-aged children             | 26.19%          | 26.48%                                                                     | 25.96%               | ---                                   | ---              |
| Has primary childcare responsibilities      | 4.59%           | 1.51%                                                                      | 7.07%                | ***                                   | ---              |
| Have eldercare responsibilities             | 16.78%          | 15.14%                                                                     | 18.09%               | ***                                   | ---              |
| Outcome: Social Inclusion                   | 3.91            | 4.01                                                                       | 3.84                 | ***                                   | ---              |
| Outcome: Harassment Experience in Past Year | 17.93%          | 9.91%                                                                      | 22.37%               | ***                                   | ---              |
| Outcome: Professional Respect               | 3.93            | 4.09                                                                       | 3.80                 | ***                                   | ---              |
| Outcome: Annual Salary                      | \$127,356       | \$141,101                                                                  | \$116,322            | ***                                   | ---              |
| Outcome: Career Advancement Opportunities   | 4.05            | 4.18                                                                       | 3.92                 | ***                                   | ---              |
| Outcome: Persistence Intentions             | 4.19            | 4.27                                                                       | 4.13                 | ***                                   | ---              |

Notes: \* p<.05; \*\* p<.01; \*\*\* p<.001; two-tailed tests, comparing WAHM and non-WAHM respondents via t-tests. Gender categories for women and men include both cisgender and transgender persons who identify as women and men, respectively. Transgender and gender non-binary status is combined above to protect confidentiality. NA-API=Native American and Asian Pacific Islander. Unlike the NSF survey, the SIS survey allowed respondents to indicate more than one racial/ethnic category.

**Table S2: Proportion of Unexplained and Explained Variation on Outcome Measures between WAHM and other STEM Professionals in Blinder-Oaxaca Decompositions**

|                                                           | Social Inclusion |                  |     | Harassment       |                  |     | Professional Respect |                  |     |
|-----------------------------------------------------------|------------------|------------------|-----|------------------|------------------|-----|----------------------|------------------|-----|
|                                                           | Diff.            | % of diff        | Sig | Diff.            | % of diff        | Sig | Diff.                | % of diff        | Sig |
| Difference, WAHM vs non-WAHM                              | .1503            | ---              | *** | .0805            | ---              | *** | .2833                | ---              | *** |
| Unexplained portion of difference                         | .1295            | 86.17%           | *** | .0653            | 81.12%           | *** | .2360                | 83.28%           | *** |
| Explained portion of difference (all categories combined) | .0208            | 13.83%           | *** | .0152            | 18.88%           | *** | .0473                | 16.72%           | *** |
| <b>Detailed Decomposition</b>                             | Portion of diff. | % of diff Expl'd | Sig | Portion of diff. | % of diff Expl'd | Sig | Portion of diff.     | % of diff Expl'd | Sig |
| <i>Category: Human Capital</i>                            | .0004            | 0.27%            |     | .0012            | 1.49%            |     | .0007                | 0.25%            |     |
| STEM field <sup>1</sup>                                   | -.0029           | -1.93%           |     | .0013            | 1.61%            |     | .0017                | 0.61%            |     |
| Highest degree                                            | .0016            | 1.06%            |     | .0002            | -0.25%           |     | -.0009               | -0.32%           |     |
| Years at employing organization                           | .0017            | 1.13%            |     | -.0001           | 0.12%            |     | -.0016               | -0.56%           |     |
| <i>Category: Background Characteristics</i>               | -.0231           | -15.37%          | *** | .0039            | 4.84%            | **  | .0032                | 1.13%            |     |
| Age                                                       | -.0131           | -8.72%           | *** | .0040            | 4.96%            | *** | .0038                | 1.34%            |     |
| Whether born in US                                        | -.0100           | -6.65%           | *** | -.0002           | -0.22%           |     | -.0004               | -0.14%           |     |
| Parents' highest level of education                       | .0000            | 0%               |     | .0000            | 0%               |     | -.0002               | -0.07%           |     |
| <i>Category: Job Characteristics</i>                      | .0137            | 9.12%            | *** | .0007            | 0.99%            |     | .0087                | 2.77%            | *** |
| Employment sector <sup>2</sup>                            | .0078            | 5.19%            | *** | .0029            | 3.60%            | *** | .0070                | 2.47%            | *** |
| Employer size                                             | .0012            | 0.80%            |     | -.0001           | -0.12%           |     | .0003                | 0.10%            |     |
| Job related to highest degree                             | -.0006           | -0.40%           |     | -.0001           | -0.12%           |     | -.0007               | -0.25%           |     |
| Primary job resp is a core technical task                 | .0000            | 0%               |     | -.0002           | -0.24%           |     | .0000                | 0%               |     |
| Supervisory responsibilities                              | .0005            | 0.33%            |     | -.0009           | -1.12%           | *** | .0006                | 0.21%            |     |
| Primarily work in teams                                   | .0048            | 3.19%            | *** | -.0008           | -1.00%           | *** | .0016                | 0.55%            | *** |
| <i>Category: Work Effort and Commitment</i>               | .0222            | 14.79%           | *** | .0050            | 6.21%            | *** | .0214                | 7.55%            | *** |
| Ave hours worked per week                                 | .0007            | 0.47%            |     | -.0004           | -0.50%           |     | .0011                | 0.39%            |     |
| Willing to put in extra effort                            | .0003            | 0.20%            |     | .0002            | 0.25%            |     | -.0001               | -0.04%           |     |
| Work is an important part of identity                     | -.0022           | -1.46%           | *   | .0001            | 0.12%            |     | -.0020               | -0.71%           | *   |
| Personally care about fate of organization                | .0234            | 15.57%           | *** | .0049            | 6.09%            | *** | .0224                | 7.91%            | *** |
| <i>Category: Family Responsibilities</i>                  | .0075            | 4.99%            | *** | .0044            | 5.47%            | *** | .0147                | 5.20%            | *** |
| Have young/school-aged children                           | .0000            | 0%               |     | .0000            | 0%               |     | -.0001               | -0.04%           |     |
| Have primary childcare responsibilities                   | .0061            | 4.06%            | *** | .0032            | 3.98%            | *** | .0119                | 4.20%            | *** |
| Have eldercare responsibilities                           | .0014            | 0.93%            | *** | .0012            | 1.49%            | *** | .0030                | 1.05%            | *** |

<sup>1</sup>“STEM field” aggregates results for separate field indicators: Life sciences, physical sciences, computer science and mathematics, other STEM field (engineering is the comparison category). <sup>2</sup>“Employment sector” aggregates the results for separate employment sector indicators: university or college, government, nonprofit, K-12, other sector (for-profit is the comparison category). Values indicate the portion of the WAHM/non-WAHM difference in the outcome measure explained by each factor (and in italics the proportion explained by that category of factors). Significance indicates whether the contribution of each factor to the difference between WAHM and non-WAHM is significantly different from zero. See Analytic Strategy section for details on the decomposition models and interpretation of coefficients. N=25,324. WAHM= white heterosexual men without disabilities.



**Table S2 (Continued):** Proportion of Unexplained and Explained Variation on Outcome Measures between WAHM and other STEM Professionals in Blinder-Oaxaca Decompositions

|                                                           | Salary           |                  |     | Professional Opportunities |                  |     | Persistence Intentions |                  |     |
|-----------------------------------------------------------|------------------|------------------|-----|----------------------------|------------------|-----|------------------------|------------------|-----|
|                                                           | Diff.            | % of diff        | Sig | Diff.                      | % of diff        | Sig | Diff.                  | % of diff        | Sig |
| Difference, WAHM vs non-WAHM                              | 24,994           | ---              | *** | .2587                      | ---              | *** | .1961                  | ---              | *** |
| Unexplained portion of difference                         | 7,831            | 31.33%           | *** | .1062                      | 41.05%           | *** | .1350                  | 68.82%           | *** |
| Explained portion of difference (all categories combined) | 17,163           | 68.67%           | *** | .1525                      | 58.95%           | *** | .0611                  | 31.16%           | *** |
| <b>Detailed Decomposition</b>                             |                  |                  |     |                            |                  |     |                        |                  |     |
|                                                           | Portion of diff. | % of diff Expl'd | Sig | Portion of diff.           | % of diff Expl'd | Sig | Portion of diff.       | % of diff Expl'd | Sig |
| <i>Category: Human Capital</i>                            |                  |                  |     |                            |                  |     |                        |                  |     |
| STEM field                                                | .651             | 2.60%            | *   | .0148                      | 5.72%            | **  | .0283                  | 14.28%           | *** |
| Highest degree                                            | .577             | 2.30%            | **  | .0032                      | 1.23%            |     | .0058                  | 2.86%            | *   |
| Years at employing organization                           | -1567            | -6.27%           | *** | -.0030                     | -1.16%           | *** | .0053                  | 2.71%            | **  |
|                                                           | 1639             | 6.56%            | *** | .0146                      | 5.64%            | *** | .0171                  | 8.72%            | *** |
| <i>Category: Background Characteristics</i>               |                  |                  |     |                            |                  |     |                        |                  |     |
| Age                                                       | 8865             | 35.47%           | *** | .0236                      | 9.12%            | *** | -.0020                 | -1.02%           | *** |
| Whether born in US                                        | 7425             | 29.71%           | *** | .0087                      | 3.36%            | **  | .0232                  | 11.83%           | *** |
| Parents' highest level of education                       | 1471             | 5.89%            | *** | .0152                      | 5.88%            | *** | -.0250                 | -12.78%          | *** |
|                                                           | -32              | -0.13%           |     | -.0003                     | -0.12%           |     | -.0002                 | -0.10%           |     |
| <i>Category: Job Characteristics</i>                      |                  |                  |     |                            |                  |     |                        |                  |     |
| Employment sector                                         | 7226             | 28.91%           | *** | .0265                      | 11.30%           | *** | -.0178                 | -9.07%           | *** |
| Employer size                                             | 6743             | 26.98%           | *** | .0030                      | 1.16%            | *   | -.0144                 | -7.34%           | *** |
| Job related to highest degree                             | -1415            | -5.66%           | *** | .0014                      | 0.54%            |     | .0000                  | 0%               |     |
| Primary job resp is a core technical task                 | -39              | -0.13%           |     | -.0011                     | -0.43%           |     | -.0013                 | -0.66%           |     |
| Supervisory responsibilities                              | 15               | 0.06%            |     | .0004                      | 0.16%            |     | -.0012                 | -0.60%           |     |
| Primarily work in teams                                   | 1151             | 4.61%            | *** | .0177                      | 6.84%            | *** | -.0015                 | -0.76%           |     |
|                                                           | 772              | 3.09%            | *** | .0078                      | 3.02%            | *** | .0006                  | 0.31%            |     |
| <i>Category: Work Effort and Commitment</i>               |                  |                  |     |                            |                  |     |                        |                  |     |
| Ave hours worked per week                                 | 23               | 0.10%            |     | .0233                      | 9.01%            | *** | .0418                  | 21.32%           | *** |
| Willing to put in extra effort                            | -289             | -1.16%           |     | .0005                      | 0.19%            |     | .0017                  | 0.87%            |     |
| Work is an important part of identity                     | 14               | 0.06%            |     | .0002                      | 0.08%            |     | .0000                  | 0%               |     |
| Personally care about fate of organization                | -51              | -0.20%           | *   | -.0035                     | -1.35%           | **  | -.0034                 | -1.89%           | **  |
|                                                           | 349              | 1.40%            | *** | .0261                      | 10.09%           | *** | .0436                  | 22.23%           | *** |
| <i>Category: Family Responsibilities</i>                  |                  |                  |     |                            |                  |     |                        |                  |     |
| Have young/school-aged children                           | 399              | 1.56%            | *** | .0153                      | 5.92%            | *** | .0109                  | 5.56%            | *** |
| Have primary childcare responsibilities                   | 48               | 0.20%            |     | .0000                      | 0%               |     | .0003                  | 0.15%            |     |
| Have eldercare responsibilities                           | 174              | 0.70%            |     | .0122                      | 4.72%            | *** | .0067                  | 3.42%            | *** |
|                                                           | 176              | 0.70%            | *** | .0031                      | 1.20%            | *** | .0037                  | 1.87%            | *** |

**Table S3:** Explained and Unexplained Portion of Variation between WAHM and Non-WAHM from Original Decomposition Models and from Supplemental Decomposition Models Including Job Satisfaction Measure

| <b>Outcome Measures</b>               | <b>Original Decomposition Models</b> | <b>Decomposition Models with Job Satisfaction</b> |
|---------------------------------------|--------------------------------------|---------------------------------------------------|
| <b>Social Inclusion</b>               |                                      |                                                   |
| Total Explained Portion               | 13.83%                               | 30.80%                                            |
| Portion Explained by Job Satisfaction | --                                   | 27.70%                                            |
| Unexplained Portion                   | 86.17%                               | 69.20%                                            |
| <b>Harassment</b>                     |                                      |                                                   |
| Total Explained Portion               | 18.88%                               | 28.60%                                            |
| Portion Explained by Job Satisfaction | --                                   | 15.60%                                            |
| Unexplained Portion                   | 81.12%                               | 71.40%                                            |
| <b>Professional Respect</b>           |                                      |                                                   |
| Total Explained Portion               | 16.72%                               | 27.40%                                            |
| Portion Explained by Job Satisfaction | --                                   | 17.30%                                            |
| Unexplained Portion                   | 83.28%                               | 72.60%                                            |
| <b>Salary</b>                         |                                      |                                                   |
| Total Explained Portion               | 68.67%                               | 70.10%                                            |
| Portion Explained by Job Satisfaction | --                                   | 2.23%                                             |
| Unexplained Portion                   | 31.33%                               | 29.9%                                             |
| <b>Professional Opportunities</b>     |                                      |                                                   |
| Total Explained Portion               | 41.05%                               | 53.90%                                            |
| Portion Explained by Job Satisfaction | --                                   | 20.60%                                            |
| Unexplained Portion                   | 58.95%                               | 46.10%                                            |
| <b>Persistence Intentions</b>         |                                      |                                                   |
| Total Explained Portion               | 31.16%                               | 57.40%                                            |
| Portion Explained by Job Satisfaction | --                                   | 42.50%                                            |
| Unexplained Portion                   | 68.82%                               | 42.60%                                            |

N=25,324. WAHM= white heterosexual men without disabilities.

**Table S4.** Gap in Workplace Experience Measures between WAHM and Non-WAHM Groups. Values are the Magnitude of the Gap Left Unexplained once Factors in Decomposition Model were Accounted For.

|                                                         | N (Non-WAHM group) | Social Inclusion | Harassment | Professional Respect | Salary   | Professional Opportunities | Persistence Intentions |
|---------------------------------------------------------|--------------------|------------------|------------|----------------------|----------|----------------------------|------------------------|
| WAHM vs. Heterosexual white women w/o disabilities      | 4092               | 0.085            | -0.086     | 0.249                | \$7,407  | 0.128                      | 0.091                  |
| WAHM vs. Heterosexual Black men w/o disabilities        | 227                | 0.137            | -0.042     | 0.261                | \$9,888  | 0.077                      | 0.133                  |
| WAHM vs. Heterosexual Black women w/o disabilities      | 144                | 0.413            | -0.106     | 0.528                | \$4,814  | 0.215                      | 0.241                  |
| WAHM vs. Heterosexual Asian men w/o disabilities        | 1317               | 0.061            | -0.003     | 0.197                | \$2,771  | 0.212                      | 0.127                  |
| WAHM vs. Heterosexual Asian women w/o disabilities      | 560                | 0.138            | -0.056     | 0.277                | \$2,683  | 0.213                      | 0.049                  |
| WAHM vs. Heterosexual Latinx/NA men w/o disabilities    | 772                | 0.028            | -0.023     | 0.122                | \$5,322  | 0.120                      | 0.018                  |
| WAHM vs. Heterosexual Latinx/NA women w/o disabilities  | 404                | 0.155            | -0.115     | 0.385                | \$8,818  | 0.185                      | 0.138                  |
| WAHM vs. Heterosexual white men with disabilities       | 1982               | 0.138            | -0.037     | 0.136                | \$8,603  | 0.055                      | 0.230                  |
| WAHM vs. Heterosexual Asian women with disabilities     | 903                | 0.219            | -0.167     | 0.450                | \$15,662 | 0.268                      | 0.340                  |
| WAHM vs. Heterosexual Black men with disabilities       | 29                 | 0.060            | -0.100     | 0.345                | \$9,375  | 0.241                      | 0.336                  |
| WAHM vs. Heterosexual Black women with disabilities     | 43                 | 0.604            | -0.192     | 0.691                | \$19,552 | 0.239                      | 0.573                  |
| WAHM vs. Heterosexual Asian men with disabilities       | 188                | 0.113            | -0.009     | 0.255                | \$12,028 | 0.210                      | 0.216                  |
| WAHM vs. Heterosexual Asian women with disabilities     | 83                 | 0.216            | -0.159     | 0.568                | \$6,714  | 0.353                      | 0.244                  |
| WAHM vs. Heterosexual Latinx/NA men with disabilities   | 154                | 0.169            | -0.141     | 0.246                | \$12,219 | 0.209                      | 0.290                  |
| WAHM vs. Heterosexual Latinx/NA women with disabilities | 101                | 0.378            | -0.128     | 0.582                | \$22,138 | 0.338                      | 0.503                  |
| WAHM vs. LGBTQ white men w/o disabilities               | 349                | 0.102            | -0.002     | 0.086                | \$8,155  | 0.066                      | 0.020                  |
| WAHM vs. LGBTQ white women w/o disabilities             | 218                | 0.163            | -0.092     | 0.236                | \$7,502  | 0.043                      | 0.099                  |
| WAHM vs. LGBTQ white men with disabilities              | 125                | 0.301            | -0.101     | 0.163                | \$6,522  | 0.023                      | 0.161                  |
| WAHM vs. LGBTQ white women with disabilities            | 98                 | 0.378            | -0.195     | 0.538                | \$7,431  | 0.371                      | 0.385                  |
| WAHM vs. LGBTQ Black men (w/ or w/o disabilities)       | 21                 | 0.686            | -0.053     | 0.658                | \$34,421 | 0.635                      | 0.178                  |
| WAHM vs. LGBTQ Black women (w/ or w/o disabilities)     | 17                 | 0.421            | -0.285     | 0.785                | \$1,723  | 0.184                      | 1.185                  |
| WAHM vs. LGBTQ Asian men (w/ or w/o disabilities)       | 65                 | 0.389            | -0.075     | 0.412                | \$22,902 | 0.314                      | 0.443                  |
| WAHM vs. LGBTQ Asian women (w/ or w/o disabilities)     | 25                 | 0.053            | -0.161     | 0.192                | \$1,318  | 0.078                      | 0.128                  |
| WAHM vs. LGBTQ Latinx/NA men (w/ or w/o disabilities)   | 64                 | 0.152            | -0.160     | 0.402                | \$23,326 | 0.304                      | 0.001                  |
| WAHM vs. LGBTQ Latinx/NA women (w/ or w/o disabilities) | 31                 | 0.436            | -0.148     | 0.380                | \$31,879 | 0.584                      | 0.484                  |

*Shading Key*

|                                   |
|-----------------------------------|
| Significant, up to 25% of St. Dev |
| >25% of magnitude of St. Dev      |
| >50% of magnitude of St. Dev      |
| >75% of magnitude of St. Dev      |
| >100% of magnitude of St. Dev     |

Note: Numbers in each cell represent the magnitude of the gap in workplace experiences between WAHM and the focal non-WAHM group that remains once the explanatory factors (listed in Table 1) are accounted for in the decomposition model. Each cell represents the focal coefficient from a single decomposition model. Because these disaggregated decomposition models require larger Ns than were needed for testing H1 and H2, the table does not disaggregate by disability status among LGBTQ-identifying STEM professionals of color. The shading reflects the relative size of the gap, and shading thresholds are defined as proportions of the magnitude of the standard deviation on that outcome; shading is included for interpretive ease only.

**Table S5.** Effect Sizes of Variation along Individual Identity Dimensions on the Workplace Experiences of Persons along the other Intersectional Identity Dimensions

|                                                                              | <b>Social Inclusion</b> | <b>Harassment</b> | <b>Professional Respect</b> | <b>Salary</b> | <b>Professional Opportunities</b> | <b>Turnover intentions</b> |
|------------------------------------------------------------------------------|-------------------------|-------------------|-----------------------------|---------------|-----------------------------------|----------------------------|
| <b>Effect of Variation by Gender (women vs. men) among....</b>               |                         |                   |                             |               |                                   |                            |
| Heterosexual white Rs w/o disabilities                                       | 0.139                   | 0.295             | 0.395                       | 0.356         | 0.218                             | 0.127                      |
| Heterosexual white Rs w/ disabilities                                        | 0.138                   | 0.383             | 0.456                       | 0.345         | 0.253                             | 0.192                      |
| LGBTQ white Rs w/o disabilities                                              | 0.116                   | 0.295             | 0.219                       | 0.207         | 0.005                             | 0.037                      |
| LGBTQ white Rs w/ disabilities                                               | 0.100                   | 0.223             | 0.467                       | 0.209         | 0.384                             | 0.193                      |
| Heterosexual Asian Rs w/o disabilities                                       | 0.105                   | 0.211             | 0.173                       | 0.190         | 0.078                             | 0.252                      |
| Heterosexual Asian Rs w/ disabilities                                        | 0.216                   | 0.468             | 0.570                       | 0.200         | 0.391                             | 0.181                      |
| LGBTQ Asian Rs w/o disabilities                                              | 0.105                   | 0.226             | 0.173                       | 0.190         | 0.075                             | 0.253                      |
| LGBTQ Asian Rs w/ disabilities                                               | 0.216                   | 0.468             | 0.570                       | 0.200         | 0.392                             | 0.181                      |
| Heterosexual Black Rs w/o disabilities                                       | 0.331                   | 0.267             | 0.387                       | 0.119         | 0.278                             | 0.224                      |
| Heterosexual Black Rs w/ disabilities                                        | 0.620                   | 0.289             | 0.474                       | 0.195         | 0.201                             | 0.315                      |
| LGBTQ Black Rs w/o disabilities                                              | 0.724                   | 0.915             | 0.693                       | 0.303         | 0.142                             | 0.984                      |
| LGBTQ Black Rs w/ disabilities                                               | 0.465                   | 0.616             | 0.456                       | 0.155         | 0.358                             | 0.154                      |
| Heterosexual Latinx/NAAPI Rs w/o disabilities                                | 0.173                   | 0.329             | 0.419                       | 0.225         | 0.151                             | 0.211                      |
| Heterosexual Latinx/NAAPI Rs w/ disabilities                                 | 0.250                   | 0.085             | 0.400                       | 0.343         | 0.202                             | 0.214                      |
| LGBTQ Latinx/NAAPI Rs w/o disabilities                                       | 0.146                   | 0.009             | 0.262                       | 0.244         | 0.031                             | 1.098                      |
| LGBTQ Latinx/NAAPI Rs w/ disabilities                                        | 0.259                   | 0.147             | 0.009                       | 0.262         | 0.244                             | 0.251                      |
| <i>Average effect size of Gender:</i>                                        | <b>0.256</b>            | <b>0.327</b>      | <b>0.383</b>                | <b>0.234</b>  | <b>0.213</b>                      | <b>0.304</b>               |
| <b>Effect of Variation by LGBTQ status (LGBTQ vs. non-LGBTQ) among....</b>   |                         |                   |                             |               |                                   |                            |
| Men white Rs w/o disabilities                                                | 0.153                   | 0.007             | 0.213                       | 0.204         | 0.212                             | 0.136                      |
| Men white Rs w/ disabilities                                                 | 0.249                   | 0.239             | 0.163                       | 0.364         | 0.144                             | 0.187                      |
| Women white Rs w/o disabilities                                              | 0.123                   | 0.018             | 0.036                       | 0.057         | 0.008                             | 0.043                      |
| Women white Rs w/ disabilities                                               | 0.193                   | 0.075             | 0.154                       | 0.240         | 0.266                             | 0.182                      |
| Men Asian Rs w/o disabilities                                                | 0.303                   | 0.210             | 0.409                       | 0.365         | 0.269                             | 0.536                      |
| Men Asian Rs w/ disabilities                                                 | 0.997                   | 0.575             | 0.638                       | 0.664         | 0.415                             | 0.627                      |
| Women Asian Rs w/o disabilities                                              | 0.183                   | 0.235             | 0.121                       | 0.210         | 0.019                             | 0.017                      |
| Women Asian Rs w/ disabilities                                               | 0.118                   | 0.278             | 0.267                       | 0.084         | 0.161                             | 0.172                      |
| Men Black Rs w/o disabilities                                                | 0.314                   | 0.060             | 0.349                       | 0.186         | 0.382                             | 0.082                      |
| Men Black Rs w/ disabilities                                                 | 0.814                   | 0.052             | 0.425                       | 0.479         | 0.753                             | 0.166                      |
| Women Black Rs w/o disabilities                                              | 0.543                   | 0.571             | 0.583                       | 0.206         | 0.104                             | 0.695                      |
| Women Black Rs w/ disabilities                                               | 0.625                   | 0.292             | 0.433                       | 0.176         | 0.508                             | 0.005                      |
| Men Latinx/NAAPI Rs w/o disabilities                                         | 0.323                   | 0.389             | 0.458                       | 0.358         | 0.508                             | 0.094                      |
| Men Latinx/NAAPI Rs w/ disabilities                                          | 0.140                   | 0.232             | 0.153                       | 0.564         | 0.128                             | 0.308                      |
| Women Latinx/NAAPI Rs w/o disabilities                                       | 0.033                   | 0.030             | 0.253                       | 0.384         | 0.377                             | 0.151                      |
| Women Latinx/NAAPI Rs w/ disabilities                                        | 0.346                   | 0.011             | 0.030                       | 0.282         | 0.382                             | 0.181                      |
| <i>Average effect size of LGBTQ status</i>                                   | <b>0.341</b>            | <b>0.205</b>      | <b>0.293</b>                | <b>0.301</b>  | <b>0.290</b>                      | <b>0.224</b>               |
| <b>Effect of Variation by Disability Status effect (w vs. w/o) among....</b> |                         |                   |                             |               |                                   |                            |
| Heterosexual white men                                                       | 0.223                   | 0.127             | 0.238                       | 0.150         | 0.183                             | 0.180                      |
| Heterosexual white women                                                     | 0.197                   | 0.220             | 0.289                       | 0.142         | 0.221                             | 0.255                      |
| LGBTQ white men                                                              | 0.306                   | 0.362             | 0.187                       | 0.310         | 0.124                             | 0.239                      |
| LGBTQ white women                                                            | 0.280                   | 0.273             | 0.400                       | 0.337         | 0.489                             | 0.399                      |
| Heterosexual Asian men                                                       | 0.064                   | 0.053             | 0.075                       | 0.004         | 0.073                             | 0.251                      |
| Heterosexual Asian women                                                     | 0.154                   | 0.318             | 0.399                       | 0.010         | 0.213                             | 0.187                      |
| LGBTQ Asian men                                                              | 0.607                   | 0.373             | 0.265                       | 0.413         | 0.060                             | 0.381                      |
| LGBTQ Asian women                                                            | 0.394                   | 0.347             | 0.674                       | 0.126         | 0.090                             | 0.376                      |
| Heterosexual Black men                                                       | 0.100                   | 0.208             | 0.159                       | 0.021         | 0.239                             | 0.278                      |
| Heterosexual Black women                                                     | 0.278                   | 0.239             | 0.281                       | 0.100         | 0.089                             | 0.332                      |
| LGBTQ Black men                                                              | 0.209                   | 0.246             | 0.738                       | 0.389         | 0.484                             | 0.239                      |
| LGBTQ Black women                                                            | 0.839                   | 0.001             | 0.703                       | 0.836         | 0.272                             | 0.254                      |
| Heterosexual Latinx/NAAPI men                                                | 0.205                   | 0.254             | 0.233                       | 0.092         | 0.131                             | 0.263                      |
| Heterosexual Latinx/NAAPI women                                              | 0.266                   | 0.005             | 0.237                       | 0.259         | 0.182                             | 0.276                      |
| LGBTQ Latinx/NAAPI men                                                       | 0.244                   | 0.124             | 0.035                       | 0.477         | 0.476                             | 0.198                      |
| LGBTQ Latinx/NAAPI women                                                     | 0.595                   | 0.038             | 0.556                       | 0.188         | 0.256                             | 0.282                      |
| <i>Average effect size of Disability status</i>                              | <b>0.310</b>            | <b>0.199</b>      | <b>0.342</b>                | <b>0.241</b>  | <b>0.224</b>                      | <b>0.274</b>               |

**Effect of Variation by Race/Ethnicity (Asian vs. White) among...**

|                                               |              |              |              |              |              |              |
|-----------------------------------------------|--------------|--------------|--------------|--------------|--------------|--------------|
| Heterosexual men w/o disabilities             | 0.109        | 0.066        | 0.378        | 0.217        | 0.408        | 0.086        |
| Heterosexual men w/ disabilities              | 0.139        | 0.114        | 0.392        | 0.254        | 0.305        | 0.158        |
| LGBTQ men w/o disabilities                    | 0.316        | 0.243        | 0.206        | 0.141        | 0.154        | 0.166        |
| LGBTQ men w/ disabilities                     | 0.152        | 0.178        | 0.104        | 0.216        | 0.078        | 0.171        |
| Heterosexual women w/o disabilities           | 0.198        | 0.278        | 0.515        | 0.386        | 0.460        | 0.171        |
| Heterosexual women w/ disabilities            | 0.237        | 0.464        | 0.677        | 0.385        | 0.477        | 0.268        |
| LGBTQ women w/o disabilities                  | 0.548        | 0.036        | 0.347        | 0.117        | 0.268        | 0.365        |
| LGBTQ women w/ disabilities                   | 0.204        | 0.269        | 0.216        | 0.268        | 0.261        | 0.070        |
| <i>Average effect size of Asian vs. White</i> | <b>0.238</b> | <b>0.206</b> | <b>0.354</b> | <b>0.248</b> | <b>0.301</b> | <b>0.182</b> |

**Effect of Variation by Race/Ethnicity (Black vs. White) among...**

|                                               |              |              |              |              |              |              |
|-----------------------------------------------|--------------|--------------|--------------|--------------|--------------|--------------|
| Heterosexual men w/o disabilities             | 0.199        | 0.164        | 0.432        | 0.310        | 0.180        | 0.110        |
| Heterosexual men w/ disabilities              | 0.117        | 0.232        | 0.329        | 0.156        | 0.156        | 0.167        |
| LGBTQ men w/o disabilities                    | 0.334        | 0.038        | 0.506        | 0.279        | 0.300        | 0.124        |
| LGBTQ men w/ disabilities                     | 0.808        | 0.041        | 0.608        | 0.476        | 0.738        | 0.218        |
| Heterosexual women w/o disabilities           | 0.397        | 0.083        | 0.383        | 0.069        | 0.235        | 0.218        |
| Heterosexual women w/ disabilities            | 0.494        | 0.176        | 0.384        | 0.011        | 0.104        | 0.325        |
| LGBTQ women w/o disabilities                  | 0.909        | 0.726        | 0.941        | 0.230        | 0.127        | 0.955        |
| LGBTQ women w/ disabilities                   | 0.617        | 0.366        | 0.388        | 0.252        | 0.772        | 0.132        |
| <i>Average effect size of Black vs. White</i> | <b>0.484</b> | <b>0.228</b> | <b>0.496</b> | <b>0.223</b> | <b>0.327</b> | <b>0.281</b> |

**Effect of Variation by Race/Ethnicity (Latinx/NAAPI vs. White) among...**

|                                                      |              |              |              |              |              |              |
|------------------------------------------------------|--------------|--------------|--------------|--------------|--------------|--------------|
| Heterosexual men w/o disabilities                    | 0.046        | 0.104        | 0.204        | 0.206        | 0.219        | 0.034        |
| Heterosexual men w/ disabilities                     | 0.045        | 0.228        | 0.206        | 0.160        | 0.167        | 0.117        |
| LGBTQ men w/o disabilities                           | 0.188        | 0.480        | 0.405        | 0.353        | 0.510        | 0.020        |
| LGBTQ men w/ disabilities                            | 0.357        | 0.251        | 0.237        | 0.451        | 0.126        | 0.418        |
| Heterosexual women w/o disabilities                  | 0.085        | 0.141        | 0.229        | 0.063        | 0.144        | 0.116        |
| Heterosexual women w/ disabilities                   | 0.174        | 0.048        | 0.187        | 0.162        | 0.127        | 0.153        |
| LGBTQ women w/o disabilities                         | 0.063        | 0.166        | 0.064        | 0.374        | 0.497        | 0.220        |
| LGBTQ women w/ disabilities                          | 0.248        | 0.185        | 0.001        | 0.216        | 0.187        | 0.095        |
| <i>Average effect size of Latinx/NAAPI vs. White</i> | <b>0.151</b> | <b>0.200</b> | <b>0.192</b> | <b>0.248</b> | <b>0.247</b> | <b>0.147</b> |

Note: Effect size= difference in means/pooled standard deviation. Numbers represent the effect sizes of variation along the focal identity dimension for that group. E.g., the effect size of variation by gender on the social inclusion measure for LGBTQ white respondents without disabilities is .116 and .105 for LGBTQ Asian respondents without disabilities. The bolded row at the bottom of each segment is the average effect size on that outcome across the groups listed directly above it.

**Table S6:** Means on Outcome Measures by Disaggregated Racial/Ethnic Categories, Disability Status, and LGBTQ Status, centered at the means for WAHM

|                              | Social Inclusion<br>(difference<br>from WAHM<br>mean) |      | Harassed in<br>Last Year<br>(difference<br>from WAHM<br>mean) |      | Professional<br>Respect<br>(difference<br>from WAHM<br>mean) |      | Annual Salary<br>(difference<br>from WAHM<br>mean) |      | Career<br>Opportunities<br>(difference<br>from WAHM<br>mean) |      | Persistence<br>Intentions<br>(difference<br>from WAHM<br>mean) |      |
|------------------------------|-------------------------------------------------------|------|---------------------------------------------------------------|------|--------------------------------------------------------------|------|----------------------------------------------------|------|--------------------------------------------------------------|------|----------------------------------------------------------------|------|
|                              | Coeff                                                 | SE   | Coeff                                                         | SE   | Coeff                                                        | SE   | Coeff                                              | SE   | Coeff                                                        | SE   | Coeff                                                          | SE   |
| Latinx                       | -.020                                                 | .028 | .045                                                          | .012 | -.121                                                        | .024 | -13,580                                            | 2619 | -.102                                                        | .032 | -.064                                                          | .050 |
| Native Amer/Pacific Islander | -.163                                                 | .067 | .017                                                          | .030 | -.074                                                        | .049 | -3,839                                             | 6437 | -.019                                                        | .076 | -.039                                                          | .121 |
| Multiracial White/Nonwhite   | -.147                                                 | .068 | .024                                                          | .030 | -.107                                                        | .059 | -9,805                                             | 6501 | -.023                                                        | .077 | -.043                                                          | .125 |
| Multiracial Nonwhite         | -.255                                                 | .128 | .026                                                          | .017 | -.262                                                        | .118 | -14,314                                            | 1305 | -.360                                                        | .154 | -.048                                                          | .039 |
| Other race/ethnicity         | -.266                                                 | .037 | .132                                                          | .019 | -.318                                                        | .035 | -17,487                                            | 3302 | -.274                                                        | .044 | -.223                                                          | .024 |
| Physical Disabilities        | -.145                                                 | .022 | .073                                                          | .010 | -.187                                                        | .019 | -16,754                                            | 2087 | -.184                                                        | .025 | -.118                                                          | .060 |
| Mental Illness               | -.377                                                 | .035 | .095                                                          | .015 | -.288                                                        | .029 | -15,577                                            | 3171 | -.251                                                        | .039 | -.072                                                          | .049 |
| Chronic Illness              | -.110                                                 | .023 | .037                                                          | .011 | -.129                                                        | .021 | -11,802                                            | 2228 | -.097                                                        | .027 | -.071                                                          | .042 |
| Transgender and Gender       |                                                       |      |                                                               |      |                                                              |      |                                                    |      |                                                              |      |                                                                |      |
| Non-binary                   | -.256                                                 | .065 | .167                                                          | .029 | -.296                                                        | .056 | -1,482                                             | 6239 | -.078                                                        | .074 | -.325                                                          | .117 |
| Bisexual                     | -.111                                                 | .055 | .010                                                          | .025 | -.120                                                        | .047 | -11,282                                            | 5259 | -.011                                                        | .062 | -.054                                                          | .102 |
| Queer                        | -.289                                                 | .058 | .139                                                          | .026 | -.176                                                        | .051 | -4,455                                             | 5537 | -.035                                                        | .067 | -.238                                                          | .107 |

Predicted means for each category, holding constant variation by STEM field, employment sector, highest education, and age. Values represent the average divergence of each group's experiences from those of WAHM. Values were produced by OLS regression models; See Analytic Strategy section for details. N=25,324. WAHM= white heterosexual men without disabilities.

## REFERENCES AND NOTES

1. National Science Foundation, “National Center for Science and Engineering Statistics, Women, Minorities, and Persons with Disabilities in Science and Engineering” (National Science Foundation, 2021).
2. National Academy of Sciences, *Expanding Underrepresented Minority Participation: America’s Science and Technology Talent at the Crossroads* (National Academy of Sciences, 2011).
3. C. Diaz-Garcia, A. Gonzalez-Moreno, F. J. Saez-Martinez, Gender diversity within R&D teams: Its impact on radicalness of innovation. *Organ. Manage.* **15**, 149–160 (2013).
4. B. Hofstra, V. V. Kulkarni, S. Munoz-Najar Galvez, B. He, D. Jurafsky, D. A. McFarland, The diversity–innovation paradox in science. *Proc. Natl. Acad. Sci. U.S.A.* **117**, 9284–9291 (2020).
5. S. E. Page, *The Diversity Bonus How Great Teams Pay Off in the Knowledge Economy* (Princeton Univ. Press, 2017).
6. National Science Foundation, “National Center for Science and Engineering Statistics, Doctorate Recipients from U.S. Universities: 2019” (National Science Foundation, 2019).
7. C. T. Begeny, M. K. Ryan, C. A. Moss-Racusin, G. Ravetz, In some professions, women have become well represented, yet gender bias persists—Perpetuated by those who think it is not happening. *Sci. Adv.* **6**, eaba7814 (2020).
8. A. A. Eaton, J. F. Saunders, R. K. Jacobson, K. West, How gender and race stereotypes impact the advancement of scholars in STEM: Professors’ biased evaluations of physics and biology post-doctoral candidates. *Sex Roles* **82**, 127–141 (2020).
9. J. R. Posselt, *Equity in Science: Representation, Culture, and the Dynamic of Change in Graduate Education* (Stanford Univ. Press, 2020).
10. B. A. Nosek, F. L. Smyth, N. Sriram, N. M. Lindner, T. Devos, A. Ayala, Y. Bar-Anan, R. Bergh, H. Cai, K. Gonsalkorale, S. Kesebir, N. Maliszewski, F. Neto, E. Olli, J. Park, K. Schnabel, K. Shiomura, B. T. Tulbure, R. W. Wiers, M. Somogyi, N. Akrami, B. Ekehammar, M. Vianello, M. R. Banaji, A. G. Greenwald, National differences in gender–science stereotypes predict national sex differences in science and math achievement. *Proc. Natl. Acad. Sci. U.S.A.* **106**, 10593–10597 (2009).
11. A. M. Santuzzi, P. R. Waltz, Disability in the workplace. *J. Manage.* **42**, 1111–1135 (2016).
12. M. Svyantek, in *2018 American Society for Engineering Education Annual Conference* (New Orleans, LA, 2018).
13. Y. Pearson Weatherton, R. D. Mayes, C. Villanueva-Perez, Barriers to persistence for engineering students with disabilities, in *2017 ASEE Annual Conference & Exposition*, Columbus, Ohio, 24 to 28 June 2017.

14. E. A. Cech, T. J. Waidzunus, Systemic inequalities for LGBTQ professionals in STEM. *Sci. Adv.* **7**, eabe0933 (2021).
15. A. Lee, A comparison of postsecondary science, technology, engineering, and mathematics (STEM) enrollment for students with and without disabilities. *Career Dev. Except. Individ.* **34**, 72–82 (2011).
16. M. Beasley, *Opting Out: Losing the Potential of America's Young Black Elite* (The Univ. Chicago Press, 2011).
17. H. Metcalf, D. Russell, C. Hill, Broadening the science of broadening participation in STEM through critical mixed methodologies and intersectionality frameworks. *Am. Behav. Sci.* **62**, 580–599 (2018).
18. C. Riegler-Crumb, B. King, Questioning a white male advantage in STEM: Examining disparities in college major by gender and race/ethnicity. *Educ. Res.* **39**, 656–664 (2010).
19. P. H. Collins, *Intersectionality as Critical Social Theory* (Duke Univ. Press, 2019).
20. K. Crenshaw, Mapping the margins: Intersectionality, identity politics, and violence against women of color. *Stanford Law Rev.* **43**, 1241 (1991).
21. P. H. Collins, *Black Feminist Thought: Knowledge, Consciousness, and the Politics of Empowerment* (Routledge, 2000).
22. P. R. Grzanka, M. J. Flores, R. A. VanDaalen, G. Velez, Intersectionality in psychology: Translational science for social justice. *Transl. Issues Psychol. Sci.* **6**, 304–313 (2020).
23. J. Misra, C. V. Curington, V. M. Green, Methods of intersectional research. *Sociol. Spectr.* **41**, 9–28 (2021).
24. E. R. Cole, Intersectionality and research in psychology. *Ame. Psychol.* **64**, 170–180 (2009).
25. P. H. Collins, Intersectionality's definitional dilemmas. *Annu. Rev. Sociol.* **41**, 1–20 (2015).
26. P. H. Collins, S. Bilge, *Intersectionality (Key Concepts)* (Polity, ed. 2, 2020).
27. M. A. Armstrong, J. Jovanovic, The intersectional matrix: Rethinking institutional change for URM women in STEM. *J. Divers. High. Educ.* **10**, 216–231 (2017).
28. D. T. Ireland, K. E. Freeman, C. E. Winston-Proctor, K. D. De Laine, S. McDonald Lowe, K. M. Woodson, (Un)Hidden figures: A synthesis of research examining the intersectional experiences of Black women and girls in STEM education. *Rev. Res. Educ.* **42**, 226–254 (2018).
29. N. Cantor, K. M. Mack, P. McDermott, O. L. Taylor, If not now, when? The promise of STEM intersectionality in the twenty-first century. *Peer Rev.* **16**, 29 (2014).
30. S. Khan, *Privilege: The Making of an Adolescent Elite at St. Paul's School* (Princeton Univ. Press, 2013).



31. M. Dancy, K. Rainey, E. Stearns, R. Mickelson, S. Moller, Undergraduates' awareness of white and male privilege in STEM. *Int. J. STEM Educ.* **7**, 52 (2020).
32. A. H. Bailey, M. LaFrance, J. F. Dovidio, Is man the measure of all things? A social cognitive account of androcentrism. *Pers. Soc. Psychol. Rev.* **23**, 307–331 (2019).
33. C. Tilly, *Durable Inequalities* (Univ. California Press, Berkeley, 1998).
34. M. McPherson, L. Smith-Lovin, J. M. Cook, Birds of a feather: Homophily in social networks. *Annu. Rev. Sociol.* **27**, 415–444 (2001).
35. I. M. Handley, E. R. Brown, C. A. Moss-Racusin, J. L. Smith, Quality of evidence revealing subtle gender biases in science is in the eye of the beholder. *Proc. Natl. Acad. Sci. U.S.A.* **112**, 13201–13206 (2015).
36. I. H. Settles, M. K. Jones, N. T. Buchanan, S. T. Brassel, Epistemic exclusion of women faculty and faculty of color: Understanding scholar(ly) devaluation as a predictor of turnover intentions. *J. Higher Educ.* **93**, 31–55 (2022).
37. S.-J. Leslie, A. Cimpian, M. Meyer, E. Freeland, Expectations of brilliance underlie gender distributions across academic disciplines. *Science* **347**, 262–265 (2015).
38. J. Des Jardins, *The Madame Curie Complex: The Hidden History of Women in Science* (The Feminist Press, 2010).
39. L. D. Gonzales, Subverting and minding boundaries: The intellectual work of women. *J. High. Educ.* **89**, 677–701 (2018).
40. C. L. Ridgeway, T. Kricheli-Katz, Intersecting cultural beliefs in social relations: Gender, race, and class binds and freedoms. *Gend. Soc.* **27**, 294–318 (2013).
41. V. Purdie-Vaughns, R. P. Eibach, Intersectional invisibility: The distinctive advantages and disadvantages of multiple subordinate-group identities. *Sex Roles* **59**, 377–391 (2008).
42. H. Mandel, M. Semyonov, Going back in time? Gender differences in trends and sources of the racial pay gap, 1970 to 2010. *Am. Sociol. Rev.* **81**, 1039–1068 (2016).
43. L. M. Cortina, D. Kabat-Farr, E. A. Leskinen, M. Huerta, V. J. Magley, Selective incivility as modern discrimination in organizations: Evidence and impact. *J. Manage.* **39**, 1579–1605 (2013).
44. National Academies of Sciences Engineering and Medicine, “Sexual Harassment of Women: Climate, Culture, and Consequences in Academic Sciences, Engineering, and Medicine” (National Academies of Sciences Engineering and Medicine, 2018).
45. E. A. Cech, Ideological wage inequalities? The technical/social dualism and the gender wage gap in engineering *Soc. Forces* **91**, 1147–1182 (2013).
46. Y. Tao, Earnings of academic scientists and engineers: Intersectionality of gender and race/ethnicity effects. *Am. Behav. Sci.* **62**, 625–644 (2018).

47. Y. Xie, K. A. Shauman, *Women in Science: Career Processes and Outcomes* (Harvard Univ. Press, 2003).
48. E. H. Branch, *Pathways, Potholes, and the Persistence of Women in Science: Reconsidering the Pipeline* (Lexington Books, 2016).
49. E. H. Ecklund, A. E. Lincoln, *Failing Families, Failing Science: Work-Family Conflict in Academic Science* (New York Univ. Press, 2016).
50. J. S. McIlwee, J. G. Robinson, *Women in Engineering: Gender, Power, and Workplace Culture* (State Univ New York Press, 1992).
51. B. Jann, The Blinder-Oaxaca decomposition for linear regression models. *Stata J.* **8**, 453–479 (2008).
52. O. O'Donnell, E. Doorslaer, A. Wagstaff, M. Lindelow, Explaining differences between groups: Oaxaca decomposition, in *Analyzing Health Equity Using Household Survey Data: A guide to Techniques and Their Implementation* (World Bank Publications, 2008) pp. 147–157.
53. C. G. Ospino, P. Roldan Vasquez, N. Barraza Narvaez, Oaxaca-Blinder wage decomposition: Methods, critiques and applications. A literature review. *Revista de Economía del Caribe*, 237–274 (2010).
54. S. Cho, K. Crenshaw, X. Williams, L. McCall, Toward a field of intersectionality studies: Theory, applications, and praxis. *Signs* **38**, 785–810 (2013).
55. C. Van Mol, Improving web survey efficiency: The impact of an extra reminder and reminder content on web survey response. *Int. J. Soc. Res. Methodol.* **20**, 317–327 (2017).
56. G. J. Duncan, E. Petersen, The long and short of asking questions about income, wealth, and labor supply. *Soc. Sci. Res.* **30**, 248–263 (2001).
57. E. Samuels, Theorizing disability studies. *Contemp. Lit.* **50**, 629–633 (2009).
58. D. Wasserman, A. Asch, J. Blustein, D. Putnam, Disability: Definitions, Models, Experience (Stanford Encyclopedia of Philosophy, 2011).
59. P. Allison, *Missing Data* (Sage, 2001).
60. A. Etezady, F. A. Shaw, P. L. Mokhtarian, G. Circella, What drives the gap? Applying the Blinder–Oaxaca decomposition method to examine generational differences in transportation-related attitudes *Transportation* **48**, 857–883 (2021).
61. T. D. Mize, Sexual orientation in the labor market. *Am. Sociol. Rev.* **81**, 1132–1160 (2016).
62. I. H. Settles, L. M. Cortina, N. T. Buchanan, K. N. Miner, Derogation, discrimination, and (dis)satisfaction with jobs in science: A gendered analysis. *Psychol. Women Q.* **37**, 179–191 (2013).

63. R. M. Guion, *Assessment, Measurement, and Prediction for Personnel Decisions* (Routledge, 2011).
64. M. S. Litwin, *How to Measure Survey Reliability and Validity* (Sage, 1995), vol. 7.
65. P. E. Gustafsson, I. Linander, P. A. Mosquera, Embodying pervasive discrimination: A decomposition of sexual orientation inequalities in health in a population-based cross-sectional study in Northern Sweden. *Int. J. Equity Health* **16**, 22 (2017).
